# Supplementary material
Source: Springer Nature journal article supplement (https://www.springermedizin.de/resource/supplementary/12985_2010_999_MOESM1_ESM.pdf/9608920)

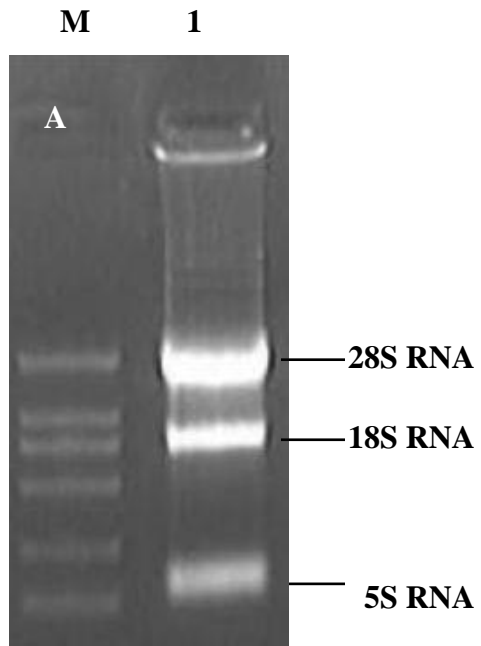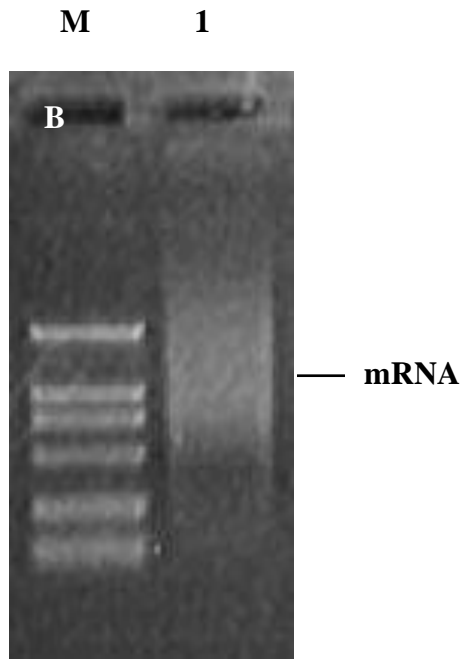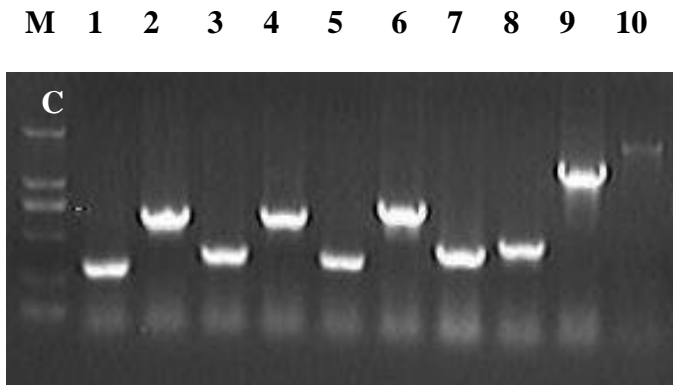

Supplement: MOESM1 [file 9608920]
